# Supplementary material for: Association of Biological Age with Tumor Microenvironment in Patients with Esophageal Adenocarcinoma
Source: bioRxiv or medRxiv preprint supplement (doi:10.1101/2022.11.14.22282214), 2022-11-15
Supplement: Supplementary file [file media-1.pdf]

Supplemental to:

## **Association of Biological Age with Tumor Microenvironment in Patients with Esophageal Adenocarcinoma**

C.J. Ravensbergen<sup>1†</sup>, Y. van Holstein<sup>2†</sup>, S.C. Hagenaars<sup>1</sup>, A.S.L.P. Crobach<sup>3</sup>, S. Trompet<sup>2</sup>, J.E.A. Portielje<sup>4</sup>, N.A. de Glas<sup>4</sup>, D. van Heemst<sup>2</sup>, F. van den Bos<sup>2</sup>, R.A.E.M. Tollenaar<sup>1</sup>, W.E. Mesker<sup>1±</sup>, S.P. Mooijaart<sup>2\*</sup> & M. Slingerland<sup>4\*</sup>

<sup>1</sup>Department of Surgery, Section Surgical Oncology, Leiden University Medical Center, Leiden, the Netherlands

<sup>2</sup>Department of Internal Medicine, Section of Gerontology and Geriatrics, Leiden University Medical Center, Leiden, the Netherlands

<sup>3</sup>Department of Pathology, Leiden University Medical Center, Leiden, the Netherlands

<sup>4</sup>Department of Medical Oncology, Leiden University Medical Center, Leiden, the Netherlands

<sup>†</sup>Contributed equally

<sup>\*</sup>Shared senior author

<sup>±</sup>Correspondence to: Dr. W.E. Mesker, Department of Surgery, Leiden University Medical Center, Albinusdreef 2, P.O. Box 9600, 2300RC Leiden, the Netherlands. Mail: [w.e.mesker@lumc.nl](mailto:w.e.mesker@lumc.nl)

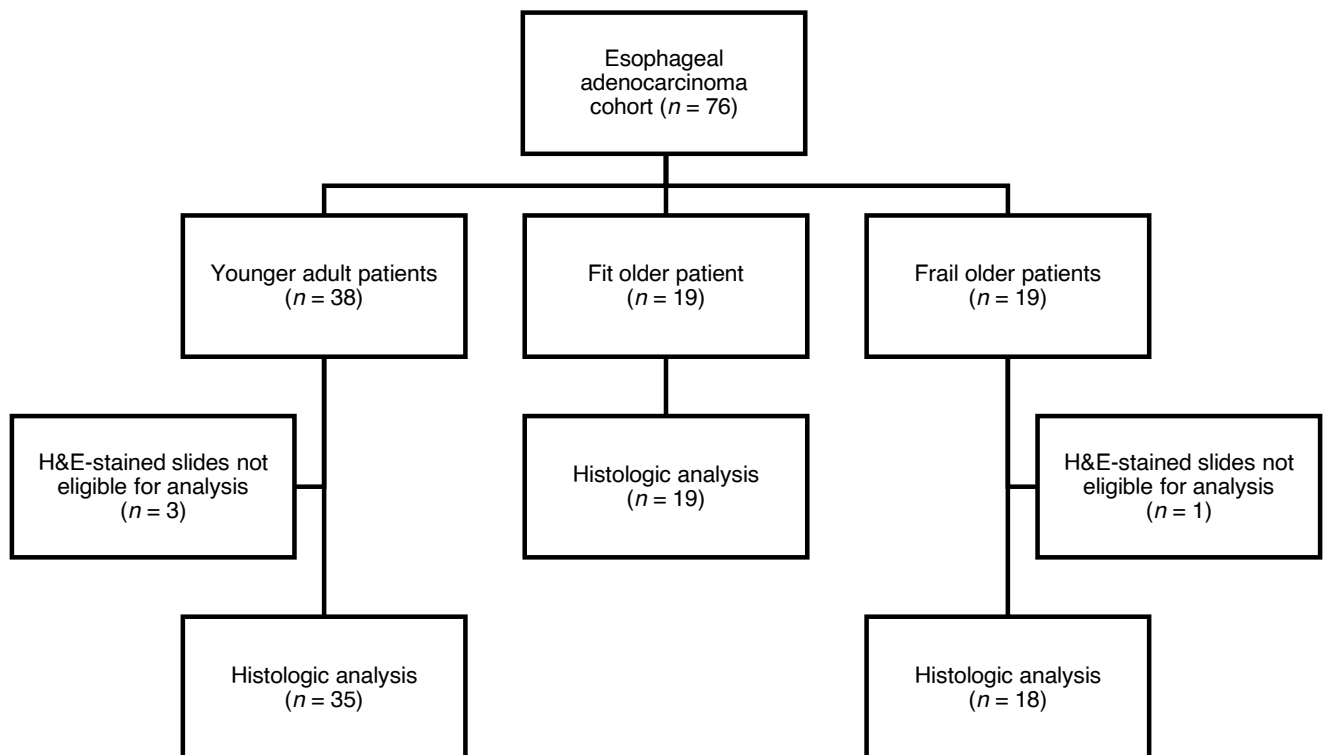

**Supplementary Figure S1.** Flowchart of cohort selection. Out of the 76 patients with esophageal adenocarcinoma selected for this study, 72 were eligible for histologic analysis and subsequently included.

A

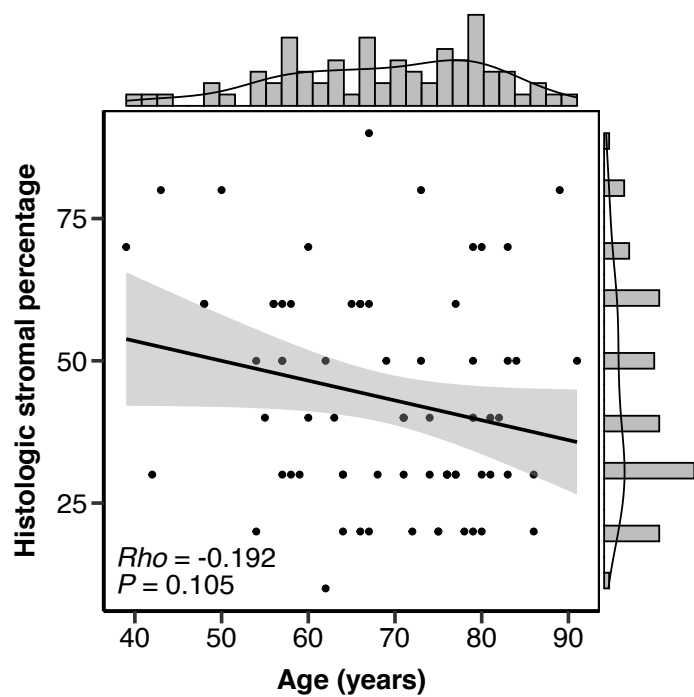

B

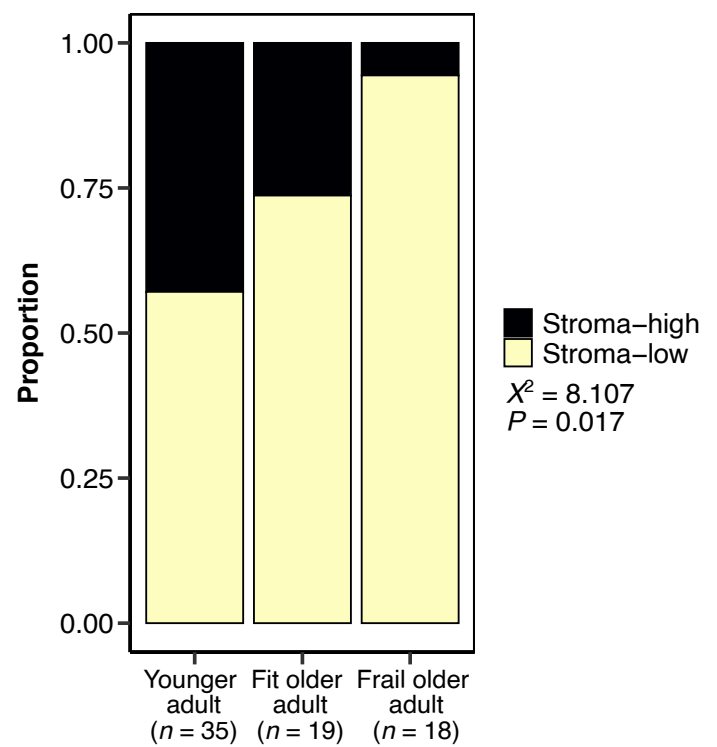

**Supplementary Figure S2.** Histologic intratumoral stroma percentage and age. (A) Scatter correlation plot of histologic intratumoral stroma percentage and chronological age. (B) Stacked bar plot of the proportions of stroma-high and stroma-low tumors, as scored by the standardized histologic tumor-stroma ratio, in strata of biological age.

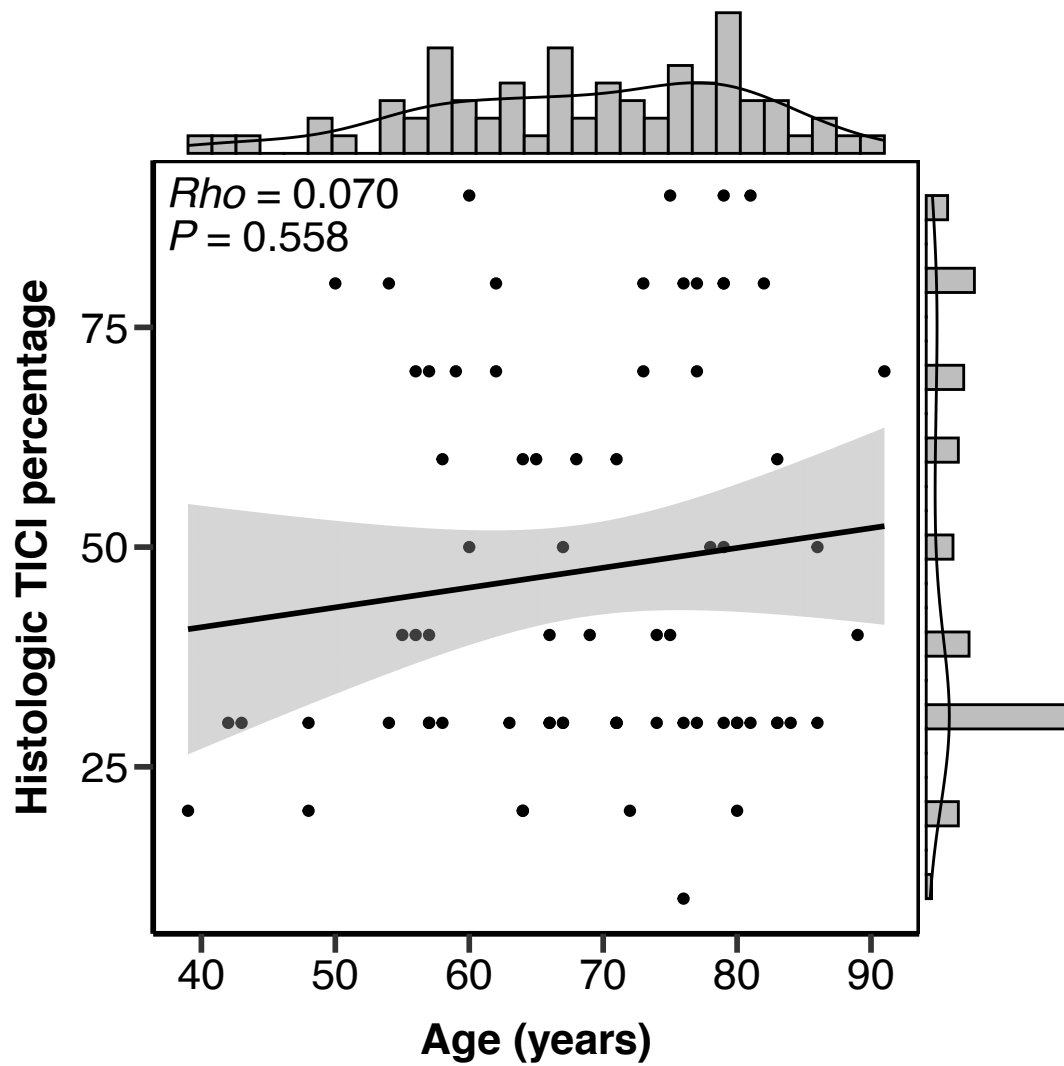

**Supplementary Figure S3.** Scatter correlation plot of histologic tumor immune cell infiltrate (TICI) and chronological age.

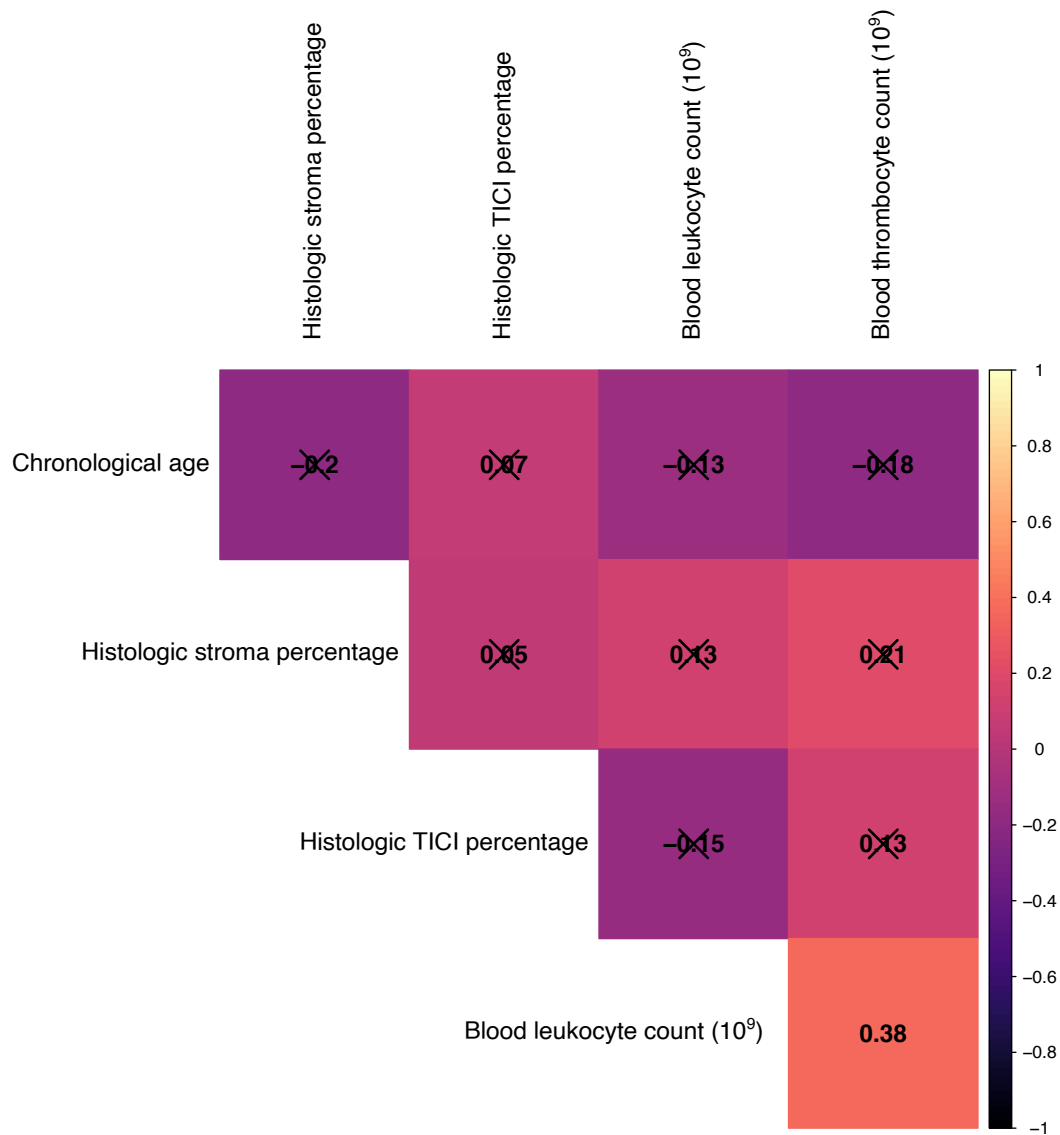

**Supplementary Figure S4.** Spearman correlation coefficient matrix of chronological age, histologic parameters, and blood cell counts. *X*, not significant.

**Supplementary Table S1.** Statistics for a multiple linear regression model containing strata of biological age, chronological age, male sex, clinical T and N stage as predictor variables and histologic intratumoral stroma percentage as dependent variable. The fit older adult group was selected as a reference.

| Variables         | Coefficient (B) | SE    | 95% CI           | T statistic | P-value |
|-------------------|-----------------|-------|------------------|-------------|---------|
| Constant          | 64.02           | 31.30 | 1.500 to 126.5   | 2.045       | 0.045*  |
| Younger adult     | -4.981          | 8.551 | -22.06 to 12.10  | -0.583      | 0.562   |
| Frail older adult | -14.66          | 6.233 | -27.11 to -2.213 | -2.352      | 0.022*  |
| Chronological age | -0.251          | 0.356 | -0.961 to 0.460  | -0.704      | 0.484   |
| Male sex          | 0.473           | 5.960 | -11.43 to 12.38  | 0.079       | 0.937   |
| cT stage          | 0.998           | 3.295 | -5.583 to 7.579  | 0.303       | 0.763   |
| cN stage          | -0.215          | 2.803 | -5.813 to 5.383  | -0.077      | 0.939   |

$R^2_{adj} = 0.051$ ,  $P = 0.151$

Abbreviations: SE, standard error; CI, confidence interval.

\*Statistically significant at  $P < 0.05$ , two-tailed

**Supplementary Table S2.** Statistics for a multiple linear regression model containing strata of biological age, chronological age, male sex, clinical T and N stage as predictor variables and blood thrombocyte count at the time of diagnosis as dependent variable. The fit older adult group was selected as a reference.

| Variables         | Coefficient (B) | SE    | 95% CI          | T statistic | P-value |
|-------------------|-----------------|-------|-----------------|-------------|---------|
| Constant          | 248.0           | 128.0 | -7.732 to 503.6 | 1.937       | 0.057   |
| Younger adult     | 15.77           | 35.01 | -54.16 to 85.71 | 0.451       | 0.654   |
| Frail older adult | -44.94          | 26.06 | -97.00 to 7.114 | -1.725      | 0.089   |
| Chronological age | 0.821           | 1.455 | -2.085 to 3.728 | 0.565       | 0.574   |
| Male sex          | -32.76          | 24.50 | -81.71 to 16.18 | -1.337      | 0.186   |
| cT stage          | -4.651          | 13.47 | -31.55 to 22.25 | -0.345      | 0.731   |
| cN stage          | 15.99           | 11.56 | -7.110 to 39.10 | 1.383       | 0.172   |

$R^2_{adj} = 0.010$ ,  $P = 0.363$

Abbreviations: SE, standard error; CI, confidence interval.

\*Statistically significant at  $P < 0.05$ , two-tailed

**Supplementary Table S3.** Statistics for a multiple linear regression model containing strata of biological age, chronological age, male sex, clinical T and N stage as predictor variables and blood leukocyte count at the time of diagnosis as dependent variable. The fit older adult group was selected as a reference.

| Variables         | Coefficient (B) | SE    | 95% CI          | T statistic | P-value |
|-------------------|-----------------|-------|-----------------|-------------|---------|
| Constant          | 12.08           | 3.746 | 4.599 to 19.57  | 3.225       | 0.002*  |
| Younger adult     | -0.865          | 1.025 | -2.912 to 1.182 | -0.884      | 0.402   |
| Frail older adult | -0.838          | 0.763 | -2.361 to 0.686 | -1.098      | 0.276   |
| Chronological age | -0.034          | 0.043 | -0.119 to 0.051 | -0.797      | 0.428   |
| Male sex          | -0.376          | 0.717 | -1.809 to 1.057 | -0.524      | 0.602   |
| cT stage          | -0.325          | 0.394 | -1.113 to 0.462 | -0.825      | 0.412   |
| cN stage          | 0.549           | 0.339 | -0.127 to 1.226 | 1.623       | 0.110   |

$R^2_{adj} = -0.017$ ,  $P = 0.571$

Abbreviations: SE, standard error; CI, confidence interval.

\*Statistically significant at  $P < 0.05$ , two-tailed
